# Supplementary material for: Mapping of deletion breakpoints at the CDKN2A locus in melanoma: detection of MTAP-ANRIL fusion transcripts
Source: PubMed Central journal article supplement (PMC4941330; doi:10.18632/oncotarget.7503), 2016-02-19
Supplement: oncotarget-07-16490-s001.pdf [file oncotarget-07-16490-s001.pdf]

SUPPLEMENTARY FIGURES AND TABLES

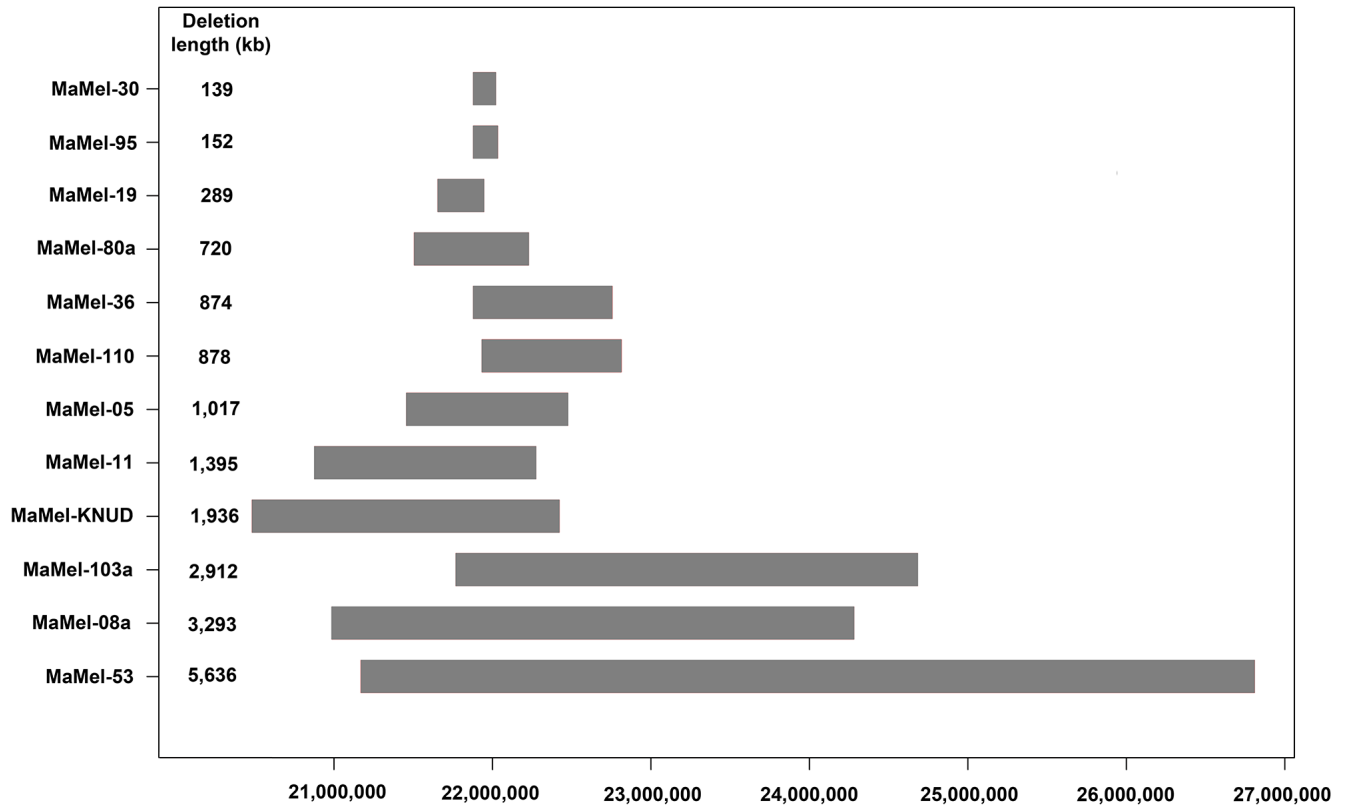

Supplementary Figure S1: A schematic representation of homozygous deletions at 9p21 locus in 12 cell lines based on aCGH data with corresponding deletion lengths.

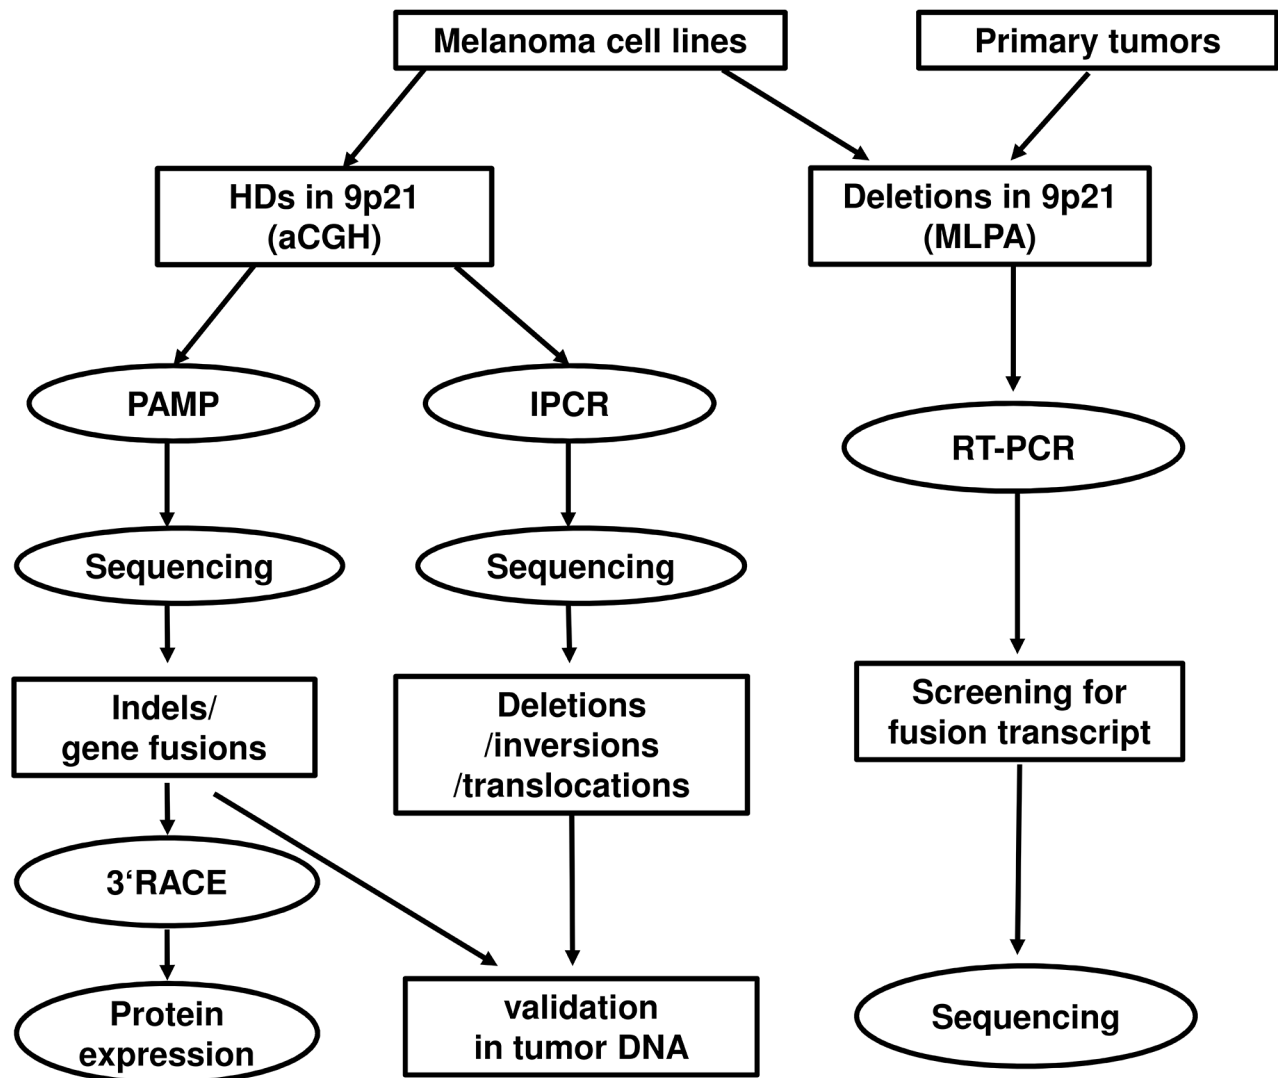

**Supplementary Figure S2: A schematic flowchart of the experimental design.** Deletion breakpoints based on aCGH were fine mapped in melanoma cell lines either by PAMP or inverse PCR. Breakpoints were validated in available tumor DNA corresponding to the cell lines. Transcripts corresponding to the fusion gene products were identified by Sanger sequencing followed by 3'RACE. The fusion transcripts were expressed in *E.coli* system followed by immuno detection of putative recombinant proteins. Melanoma cell lines and primary tumors were investigated by multiplex ligation probe analysis (MLPA) for deletions at the CDKN2A/B locus and cDNA from cell lines and primary tumors with deletions at the locus were screened for fusion transcripts.

**A**MaMel-30 (1-6 exons of *MTAP* and exon 5 of *ANRIL* onwards)

ctccgcaactgctcactcccgcgcagtgaggttggcacagccaccgctctgtggctcgcttgg  
 ttccttagtcccgagcgctcgcccactgcagattcctttcccgtgcagac**ATG**GCCTCT  
 M A S  
 GGCACCACCACCACCGCCGTGAAGATTGGAATAATTGGTGGAACAGGCCCTGGATGATCCA  
 G T T T T A V K I G I I G G T G L D D P  
 GAAATTTTAGAAGGAAGAAGACTGAAAAATATGTGGATACTCCATTTGGCAAGCCATCTGAT  
 E I L E G R T E K Y V D T P F G K P S D  
 GCCTTAATTTTGGGAAGATAAAAAATGTTGATTGCGTCCTCCTTGCAAGGCATGGAAGG  
 A L I L G K I K N V D C V L L A R H G R  
 CAGCACACCATCATGCCTTCAAAGGTCAACTACCAGGCGAACATCTGGGCTTTGAAGGAA  
 Q H T I M P S K V N Y Q A N I W A L K E  
 GAGGGCTGTACACATGTCATAGTGACCACAGCTTGTGGCTCCTTGAGGGAGGAGATTGAG  
 E G C T H V I V T T A C G S L R E E I Q  
 CCCGGCGATATTGTCATTATTGATCAGTTCATTGACAGGACCACTATGAGACCTCAGTCC  
 P G D I V I I D Q F I D R T T M R P Q S  
 TTCTATGATGGAAGTCATTCTTGTGCCAGAGGAGTGTCCATATTCCAATGGCTGAGCCG  
 F Y D G S H S C A R G V C H I P M A E P  
 TTTTGCCCCAAAACGAGAGAGGTTCTTATAGAGACTGCTAAGAAGCTAGGACTCCGGTGC  
 F C P K T R E V L I E T A K K L G L R C  
 CACTCAAAGGGGACAATGGTCACAATCGAGGGACCTCGTTTTAGCTCCCGGCAGAAAGC  
 H S K G T M V T I E G P R F S S R A E S  
 TTCATGTTCCGCACCTGGGGGGCGGATGTTATCAACATGACCACAGTTCCAGAGGTGGTT  
 F M F R T W G A D V I N M T T V P E V V  
 CTTGCTAAGGAGGCTGGAATTTGTTACGCAAGTATCGCCATGGCGACAGATTATGACTGC  
 L A K E A G I C Y A S I A M A T D Y D C  
 TGGAAGGAGCACGAGGAAGCA**TGTCCCTTTgatgagaagaataagcctcattctgattc**  
 W K E H E E A **C P F \* \***  
**aacagcagagatcaaagaaaagacttctgttttctggccaccagatatatggtatctgtg**  
**cttaagaattgaaaaacacacatcaaaggagaattttcttggaagagagggttcaagc**  
**atcactgttaggtgtggtggaatcctttcccagagtcagtactgctttctagaagaaaacc**  
**ggggagatctatttggaatgtatctaactcaaagaaaccatcagaggtaacaggtagga**  
**gatatgaaacgaccttttagatatgaaccctaattgaataaaagttgccaacaactgtt**  
**cccaaacatctaagaagagtttttagtctaagtggaatggctggagagtatgggaagagt**  
**tctttcctactctgtccaacacaagcctctgtgacatttatcaaagaaatgcagccctt**  
**ttaatctgggtataagtcgaaaggtgctttccttggaagcttctttgtcctctgctt**  
**ttaggactctttctgcacactgcacctctatgtcaccctccagtacatctgctcttaca**  
**caaggggccccacagggactggctcacacaccagccagggcacatgggccaacttttaac**  
**agcaaaaaaaaaaaaaaaaaaaaaaa**

**Supplementary Figure S3: Full length cDNA and derived amino acids sequence of *MTAP-ANRIL* fusion transcripts.** The contribution to the fusion transcripts from *MTAP* is shown in black and from *ANRIL* in red **A**. MaMel-30 encoded a *MTAP-ANRIL* fusion transcript that included exons 1-6 of *MTAP* and *ANRIL* from exon 5 onwards. (Continued)

**B**

MaMeI-95 (1-6 exons of MTAP and exon 5 of ANRIL onwards)

ctccgcactgctcactcccgcgcagtgaggttggcacagccaccgctctgtggctcgcttgg  
 ttcccttagtcccgcgcgctcgcccactgcagattcctttcccgtgcagac**ATG**GCCTCT  
 M A S  
 GGCACCACCACCACCGCCGTGAAGATTGGAATAATTGGTGGAACAGGCCTGGATGATCCA  
 G T T T T A V K I G I I G G T G L D D P  
 GAAATTTTAGAAGGAAGAACTGAAAAATATGTGGATACTCCATTTGGCAAGCCATCTGAT  
 E I L E G R T E K Y V D T P F G K P S D  
 GCCTTAATTTTGGGGAAGATAAAAAATGTTGATTGCGTCCTCCTTGCAAGGCATGGAAGG  
 A L I L G K I K N V D C V L L A R H G R  
 CAGCACACCATCATGCCTTCAAAGGTCAACTACCAGGCGAACATCTGGGCTTTGAAGGAA  
 Q H T I M P S K V N Y Q A N I W A L K E  
 GAGGGCTGTACACATGTCATAGTGACCACAGCTTGTGGCTCCTTGAGGGAGGAGATTGAG  
 E G C T H V I V T T A C G S L R E E I Q  
 CCCGGCGATATTGTCATTATTGATCAGTTCATTGACAGGACCACTATGAGACCTCAGTCC  
 P G D I V I I D Q F I D R T T M R P Q S  
 TTCTATGATGGAAGTCATTCTTGTGCCAGAGGAGTGTGCCATATTCCAATGGCTGAGCCG  
 F Y D G S H S C A R G V C H I P M A E P  
 TTTAGCCCCAAAACGAGAGAGGTTCTTATAGAGACTGCTAAGAAGCTAGGACTCCGGTGC  
 F S P K T R E V L I E T A K K L G L R C  
 CACTCAAAGGGGACAATGGTCACAATCGAGGGACCTCGTTTTAGCTCCCGGGCAGAAAGC  
 H S K G T M V T I E G P R F S S R A E S  
 TTCATGTTCCGCACCTGGGGGGCGGATGTTATCAACATGACCACAGTTCAGAGGTGGTT  
 F M F R T W G A D V I N M T T V P E V V  
 CTTGCTAAGGAGGCTGGAATTTGTTACGCAAGTATCGCCATGGCGACAGATTATGACTGC  
 L A K E A G I C Y A S I A M A T D Y D C  
 TGAAGGAGCACGAGGAAGCA**TGTCCTTTTgatgagaagaataagcctcattctgattc**  
 W K E H E E A **C P F \* \***  
**aacagcagagatcaaagaaaagacttctgttttctggccaccagatatatggtatctgtg**  
**cttaagaattgaaaaacacacatcaaaggagaattttcttgaaagagagggttcaagc**  
**atcactgttaggtgtggtggaatcctttcccgcgcgctcagtaactgctttctaggagaaaacc**  
**ggggagatctatttggaaatgtatctaactcaaagaaccatcagaggtaacagccagag**  
**ctacctccagatgacttctttctaccactttctttcttcccagtgtaagagaatgcaag**  
**tatatgctgatgtttggagcaagaacgttcaaaaattttcttattaacgtaacttctaat**  
**ggaaatacagtataactactatggtgcatacaaagaagaatagcaacatatatttgtttt**  
**agacctgattgctgtattttattccttaggtcctccttgatgtctttagaccgtcacta**  
**gctaattgttacagccatcgaaggaaaaaataaggatttttacttaggacatacgtaca**  
**gaaaaagagatggttttagcaaaaaaaaaaaaaaaaaaaaaaaaaa**

**Supplementary Figure S3: (Continued) Full length cDNA and derived amino acids sequence of MTAP-ANRIL fusion transcripts. B.** MaMeI-95 encoded a MTAP-ANRIL fusion transcript that included exons 1-6 of MTAP and ANRIL, exon 5 onwards. (Continued)

**C**

MaMel-30 (1-7 exons of MTAP and exon 5 of ANRIL onwards)

ctccgcactgctcactcccgcgcagtgaggttggcacagccaccgctctgtggctcgcttgg  
 ttcccttagtcccgagcgcctcgcccactgcagattcctttcccgtgcagac**ATG**GCCTCT  
 M A S  
 GGCACCACCACCACCGCCGTGAAGATTGGAATAATTGGTGGAACAGGCCTGGATGATCCA  
 G T T T T A V K I G I I G G T G L D D P  
 GAAATTTTAGAAGGAAGAACTGAAAAATATGTGGATACTCCATTGGCAAGCCATCTGAT  
 E I L E G R T E K Y V D T P F G K P S D  
 GCCTTAATTTTGGGAAGATAAAAAATGTTGATTGCGTCCTCCTGCAAGGCATGGAAGG  
 A L I L G K I K N V D C V L L A R H G R  
 CAGCACACCATCATGCCTTCAAAGGTCAACTACCAGGCGAACATCTGGGCTTTGAAGGAA  
 Q H T I M P S K V N Y Q A N I W A L K E  
 GAGGGCTGTACACATGTCATAGTGACCACAGCTTGTGGCTCCTTGAGGGAGGAGATTGAG  
 E G C T H V I V T T A C G S L R E E I Q  
 CCCGGCGATATTGTCATTATTGATCAGTTCATTGACAGGACCACTATGAGACCTCAGTCC  
 P G D I V I I D Q F I D R T T M R P Q S  
 TTCTATGATGGAAGTCATTCTTGTGCCAGAGGAGTGTGCCATATCCAATGGCTGAGCCG  
 F Y D G S H S C A R G V C H I P M A E P  
 TTTTGGCCCAAAACGAGAGAGGTTCTTATAGAGACTGCTAAGAAGCTAGGACTCCGGTGC  
 F C P K T R E V L I E T A K K L G L R C  
 CACTCAAAGGGGACAATGGTCACAATCGAGGGACCTCGTTTTAGCTCCCGGGCAGAAAGC  
 H S K G T M V T I E G P R F S S R A E S  
 TTCATGTTCCGCACCTGGGGGGCGGATGTTATCAACATGACCACAGTTCAGAGGTGGTT  
 F M F R T W G A D V I N M T T V P E V V  
 CTTGCTAAGGAGGCTGGAATTTGTTACGCAAGTATCGCCATGGCGACAGATTATGACTGC  
 L A K E A G I C Y A S I A M A T D Y D C  
 TGGAAGGAGCACGAGGAAGCAGTTTCGGTGGACCGGGTCTTAAAGACCCTGAAAGAAAAC  
 W K E H E E A V S V D R V L K T L K E N  
 GCTAATAAAGCCAAAAGCTTACTGCTCACTACCATACTCAGATAGGGTCCACAGAATGG  
 A N K A K S L L L T T I P Q I G S T E W  
 TCAGAAACCCTCCATAACCTGAAG**TGTCCTTTTGGATGAGAAGAATAAGCCTCATTCTGA**  
 S E T L H N L K **C P F \* \***  
**ttcaacagcagagatcaaagaaaagacttctgttttctggccaccagatatatggtatct**  
**gtgcttaaagaattgaaaaacacacatcaaaggagaattttcttggaaagagagggttca**  
**agcatcactgttaggtgtggtggaatcctttcccaggtcagtaactgctttctagaagaaa**  
**accggggagatctatttggaatgtatctaactccaaagaaacctcagaggtaacaggtg**  
**ggagatatgaaacgaccttttagatatgaaccctaattgaataaaagttgccaacaact**  
**gttcccaaacatctaagaagagtttttagtctaagtggaatggctggagagtatgggaag**  
**agttctttcctactctgtccaacacaagcctctgtgacatttatcaaagaaatgcagcc**  
**ctttaaatctgggtataagtccgaaaggtgctttccttgtgaagcttcttttctcctctg**  
**cttttaggactctttctgcacactgcatcctctatgtcaccctccagtacatctgctctt**  
**acacaaggggccccacagggactggctcacacaccagccagggccacatgggccaactttt**  
**aacagcaaaaaaaaaaaaaaaaaaaaaa**

**Supplementary Figure S3: (Continued) Full length cDNA and derived amino acids sequence of MTAP-ANRIL fusion transcripts.** C. MaMel-30 also showed a second MTAP-ANRIL fusion transcript that included exons 1-7 of MTAP and ANRIL exon 5 onwards. The sequence data have been submitted to the GenBank databases under accession numbers KT386339-KT386341.

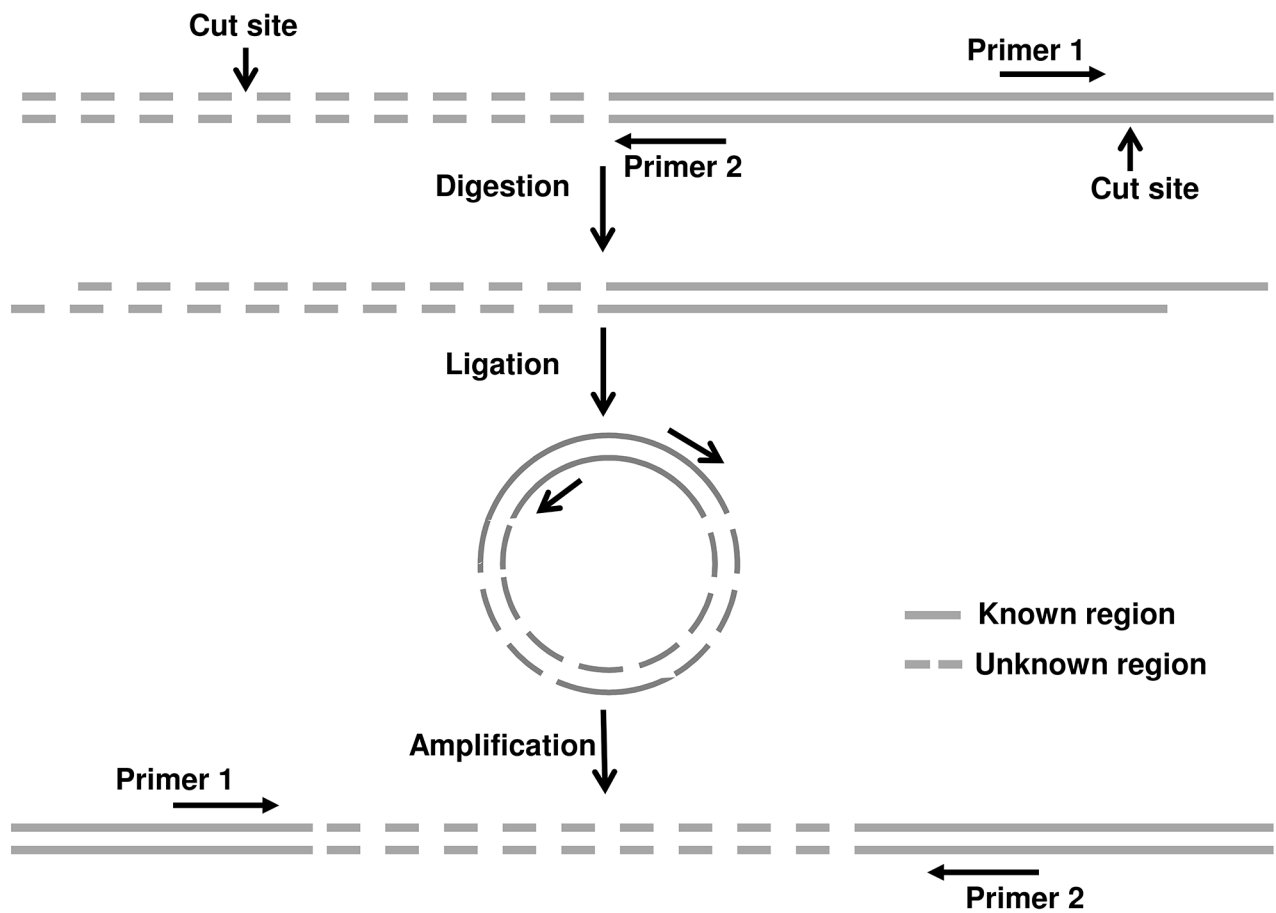

**Supplementary Figure S4: A schematic representation of inverse PCR methodology.** A primer pair was designed in the known sequence of DNA adjacent to the unknown region. A rare cutting restriction enzyme was selected within the known part of the sequence and digested to generate a template that was self-ligated to form a circular DNA. PCR was performed using forward and reverse primers that amplify the circular template. The amplicons were sequenced to determine the unknown DNA sequence.

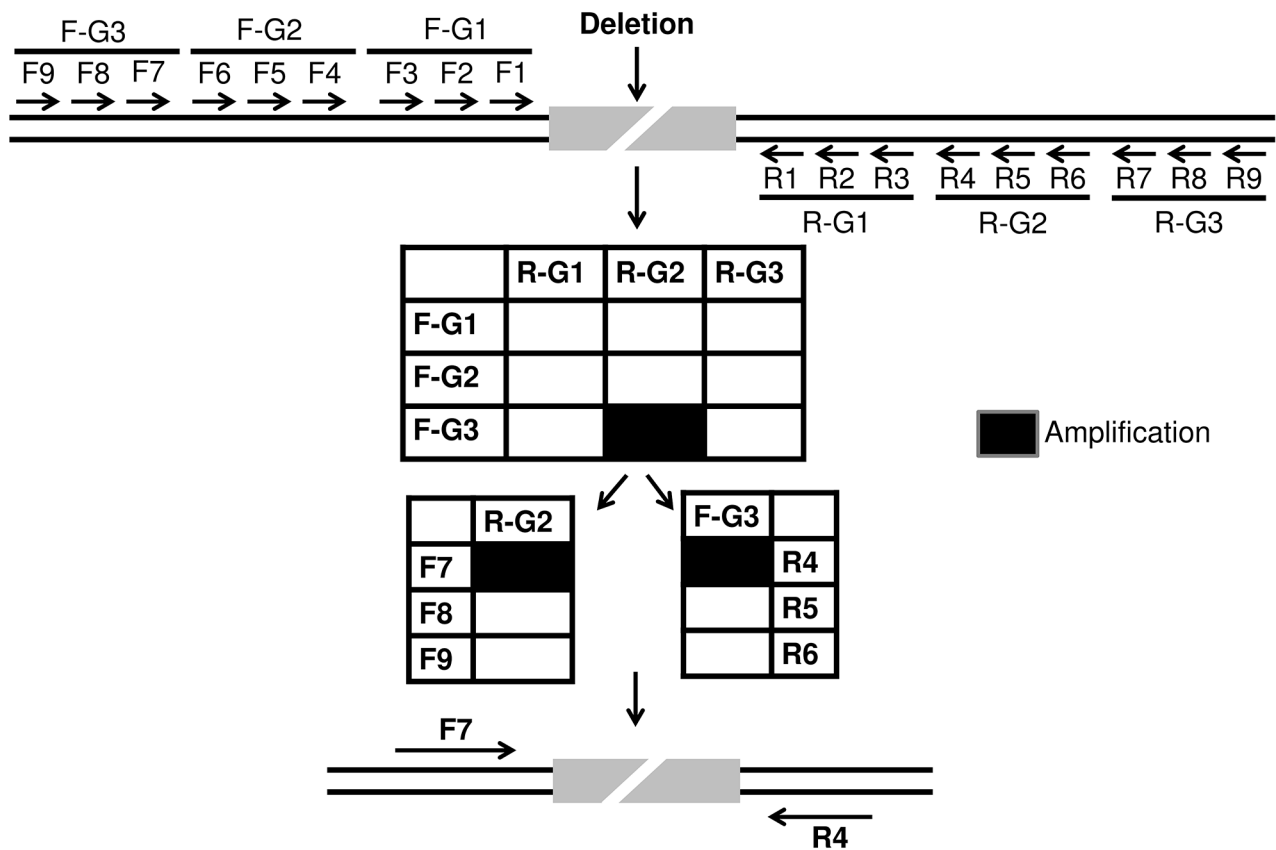

**Supplementary Figure S5: A schematic representation of PAMP methodology.** The deletion locus was flanked by nine primer pairs that were in turn grouped to contain three primers each. The forward and reverse primer groups were mixed in all possible combinations to result in 9 multiplex reactions. The positive amplicon (gray colored box) diluted 1:100 in water was used as template in repeat PCR using corresponding forward primer group and individual primers from the respective reverse primer group. In parallel, similar reaction was set using reverse primer group and individual primers from respective forward primer group. Finally, the genomic DNA was amplified using specific primers identified from repeat multiplex PCR.

Supplementary Table S1: Comparison of Chr 9p21 deletion coordinates in 5 cell lines analyzed (NCBI Build 37/hg19)

| Cell line  | Method         | Telomeric side             |                            | Centromeric side           |                            | Deletion length (PAMP/IPCR)                                                                                      |
|------------|----------------|----------------------------|----------------------------|----------------------------|----------------------------|------------------------------------------------------------------------------------------------------------------|
|            |                | SNP CN $\geq$ 1            | SNP CN=0                   | SNP CN=0                   | SNP CN $\geq$ 1            |                                                                                                                  |
| MaMel-30   | aCGH           | rs7865071<br>(21,890,326)  | rs10811638<br>(21,923,279) | rs17694493<br>(22,041,998) | rs10965224<br>(22,067,276) | 141 kb deletion                                                                                                  |
|            | PCR validation | rs7865071<br>(21,890,326)  | rs10811638<br>(21,923,279) | rs564398<br>(22,029,547)   | rs17694493<br>(22,041,998) |                                                                                                                  |
|            | PAMP           | 21,893,332                 |                            | 22,034,193                 |                            |                                                                                                                  |
| MaMel-95   | aCGH           | rs7865071<br>(21,890,326)  | rs10811638<br>(21,923,279) | rs10965224<br>(22,067,276) | rs16905599<br>(22,069,144) | 181 kb deletion                                                                                                  |
|            | PCR validation | rs7039105<br>(21,855,096)  | rs16938577<br>(21,860,428) | rs564398<br>(22,029,547)   | rs17694493<br>(22,041,998) |                                                                                                                  |
|            | PAMP           | 21,855,742                 |                            | 22,036,449                 |                            |                                                                                                                  |
| MaMel-103a | aCGH           | rs7846749<br>(21,780,251)  | rs9298826<br>(21,787,848)  | rs17799860<br>(24,709,463) | rs16908747<br>(24,717,136) | 2,994 Mb deletion and 97 bp insertion (complementary strand of Chr9:24,718,771- 24,718,675)                      |
|            | PCR validation | rs6475555<br>(21,716,997)  | rs4341236<br>(21,727,208)  | rs16908747<br>(24,717,136) | rs7854810<br>(24,725,322)  |                                                                                                                  |
|            | PAMP           | 21,725,260                 |                            | 24,718,843                 |                            |                                                                                                                  |
| MaMel-19   | aCGH           | rs10119803<br>(21,666,066) | rs16938524<br>(21,673,153) | rs3731213<br>(21,986,218)  | rs3731194<br>(21,991,752)  | 320 kb deletion and 1.1 Mb inversion (chr9:21,994,653-23,090,311)                                                |
|            | PCR validation | rs16938527<br>(21,673,608) | rs7866337<br>(21,679,452)  | rs3731194<br>(21,991,752)  | rs3218003<br>(22,000,770)  |                                                                                                                  |
|            | Inverse PCR    | 21,674,438                 |                            | 21,994,653                 |                            |                                                                                                                  |
| MaMel-08a  | aCGH           | rs4468020<br>(20,996,709)  | rs1857647<br>(21,016,929)  | rs41370049<br>(24,353,310) | rs16908321<br>(24,375,619) | 3,183 Mb deletion and translocation (telomeric side: t(9;15)(p21.3;-q12); centromeric side t(9;6)(p21.3; p12.1)) |
|            | PCR validation | rs10757178<br>(21,046,674) | rs2383177<br>(21,068,841)  | rs17197000<br>(24,244,133) | rs17197195<br>(24,247,485) |                                                                                                                  |
|            | Inverse PCR    | 21,062,696                 |                            | 24,246,191                 |                            |                                                                                                                  |

aCGH: array comparative genomic hybridization, SNP: single nucleotide polymorphism, CN: Copy number, PAMP: primer approximation multiplex PCR.



**Supplementary Table S2: Sequence of characterized breakpoint junctions in 5 melanoma cell lines(NCBI Build 37/hg19).**

See Supplementary File 1

**Supplementary Table S3: Primers used in the analysis**

| Cell lines                           | Forward primer             | Reverse primer            |
|--------------------------------------|----------------------------|---------------------------|
| <b>For cloning breakpoints</b>       |                            |                           |
| MaMel-30                             | GAACCACATCTTGACCATAAAGC    | TCCCAGGATATCTCACCAAAGTA   |
| MaMel-95                             | GAAGGGCATGATTGAGTAGAGTG    | CAAAGTGGTACATTGATGTCAGG   |
| MaMel-103a                           | ATATGTCCCAGGCAAAAGATACA    | AACCCTTCTACACATTGCTTTAGG  |
| MaMel-19: Breakpoint (telomeric)     | CTAGGATGGAGACAGGCAGATTA    | CGATAAACCAGAAATGAATGAGG   |
| MaMel-19: Breakpoint (centromeric)   | GCTGTTCTGGTGATTAAGTCT      | AGATGACCTCGCTTTCCTTTCTT   |
| MaMel-08a: Breakpoint (telomeric)    | GAAGCCTCCTAAATCCCAATCT     | TGCCTAGGCTTGTGTTAATTC     |
| MaMel-08a: Breakpoint (centromeric)  | CAATGGTTATGGACCTTGTATT     | ATCCCATGTGCATCTCAATACTT   |
| <b>For inverse PCR</b>               |                            |                           |
| MaMel-19 (telomeric)                 | AACTGTGATGGCAGCTTGTCTA     | ATCATTCAATTCCTTCCCATTG    |
| MaMel-19 (centromeric)               | CTCGCGTAGAATGGTTGTCTTG     | AAGAGGAAGAAGCGCTCAGATG    |
| MaMel-08a (telomeric)                | AAGAGCGCTTTCAAGTACAGCTT    | AGGGCAATCATGAGTTAAGACCT   |
| MaMel-08a (centromeric)              | CAGGATGGACTACAATTCTGAGC    | AGTTCATCATCCCATTGTCATCT   |
| <b>For RACE</b>                      |                            |                           |
| MTAP-EX4-F                           | ATGCCTTCAAAGGTCAACTA       |                           |
| F65                                  | AAGGAGCACGAGGAAGCATGTCC    |                           |
| F75                                  | GAAACCCTCCATAACCTGAAGTGTCC |                           |
| <b>For cloning into pET20b</b>       |                            |                           |
| Fwd-primer_NdeI                      | GTCACATATGGCCTCTGGCACCACC  |                           |
| <b>For reverse transcription PCR</b> |                            |                           |
| MTAP-EX4-F                           | ATGCCTTCAAAGGTCAACTA       |                           |
| ANRIL-EX6-R                          |                            | CTGTTACCTCTGATGGTTTCTT    |
| MTAP-EX4-F2                          | AGGCGAACATCTGGGCTTTGA      |                           |
| ANRIL-EX6-R2                         |                            | CAGTACTGACTCGGGAAAGGA     |
| <b>For the whole transcript</b>      |                            |                           |
| MTAP-EX1-F                           | GCTCTGTGGCTCGCTTGGTT       |                           |
| MaMel-30-transcript1_2               |                            | TGCTGTAAAAGTTGGCCCATG     |
| MaMel-95-transcript1                 |                            | TTTTTGCTAAACCATCTCTTTTCTG |
